# Supplementary material for: Microbiota in Gut, Oral Cavity, and Mitral Valves Are Associated With Rheumatic Heart Disease
Source: PubMed Central journal article supplement (PMC7985333; doi:10.3389/fcimb.2021.643092), 2021-03-09
Supplement: DataSheet_1.pdf [file DataSheet_1.pdf]

## *Supplemental materials*

Supplemental Table 1 Characteristics of the study subjects

| Variables                                     | Control subjects<br>(n=20) | RHD patients<br>(n=20) | p value |
|-----------------------------------------------|----------------------------|------------------------|---------|
| males, n (%)                                  | 9 (45)                     | 7 (35)                 | 0.5724  |
| age, years                                    | 60.45±12.53                | 59.6±9.67              | 0.6436  |
| aortic root dimensions, mm                    | 30.75±3.338                | 31.3±2.736             | 0.5577  |
| left atrial diameter, mm                      | 36.5±5.031                 | 53.75±10.15            | <0.0001 |
| inter-ventricular thickness, mm               | 9.5±1.235                  | 9.8±1.642              | 0.3902  |
| left ventricular posterior wall thickness, mm | 9.25±1.251                 | 9.7±1.72               | 0.1430  |
| pulmonary trunk diameter, mm                  | 23.25±1.446                | 24.2±2.238             | 0.1602  |
| pulmonary artery systolic pressure, mm        | 35.67±7.678                | 46.84±13.4             | 0.0029  |
| left ventricular ejection fraction, %         | 64.95±1.791                | 57.7±9.658             | 0.0031  |

Supplemental Figure 1

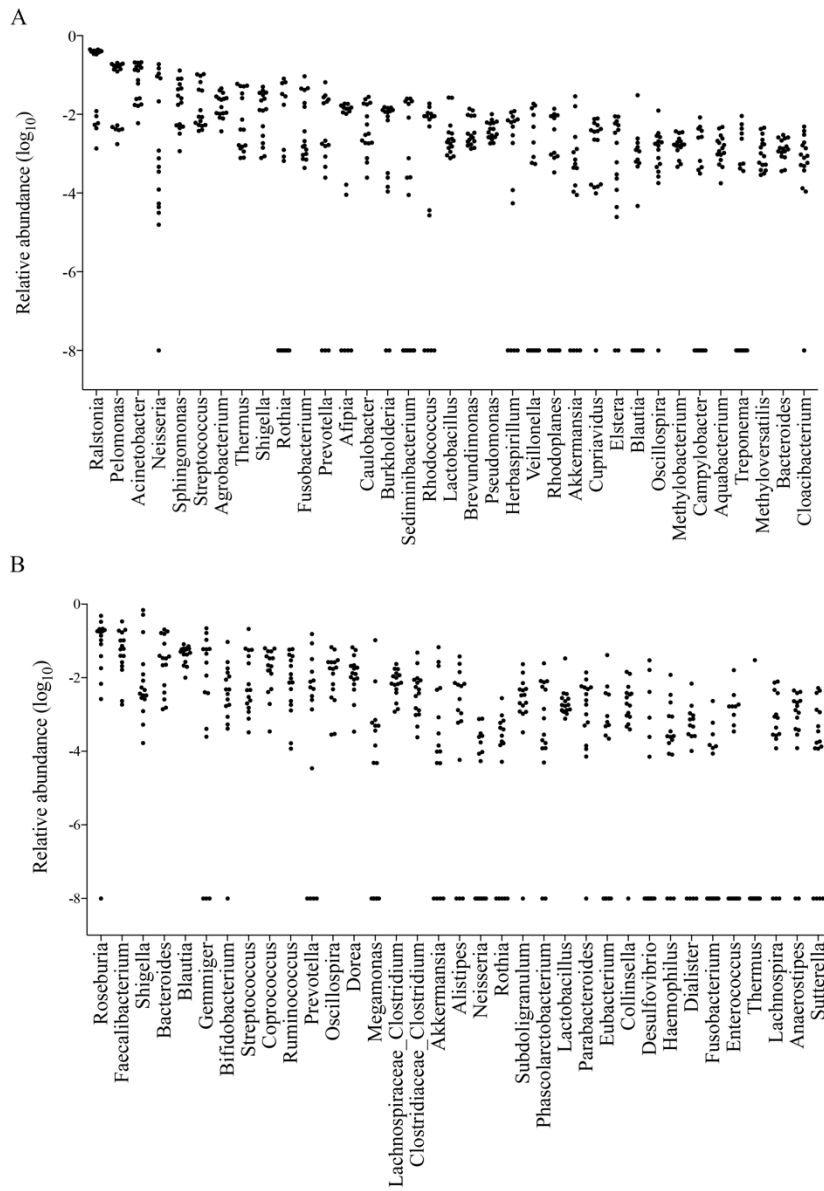

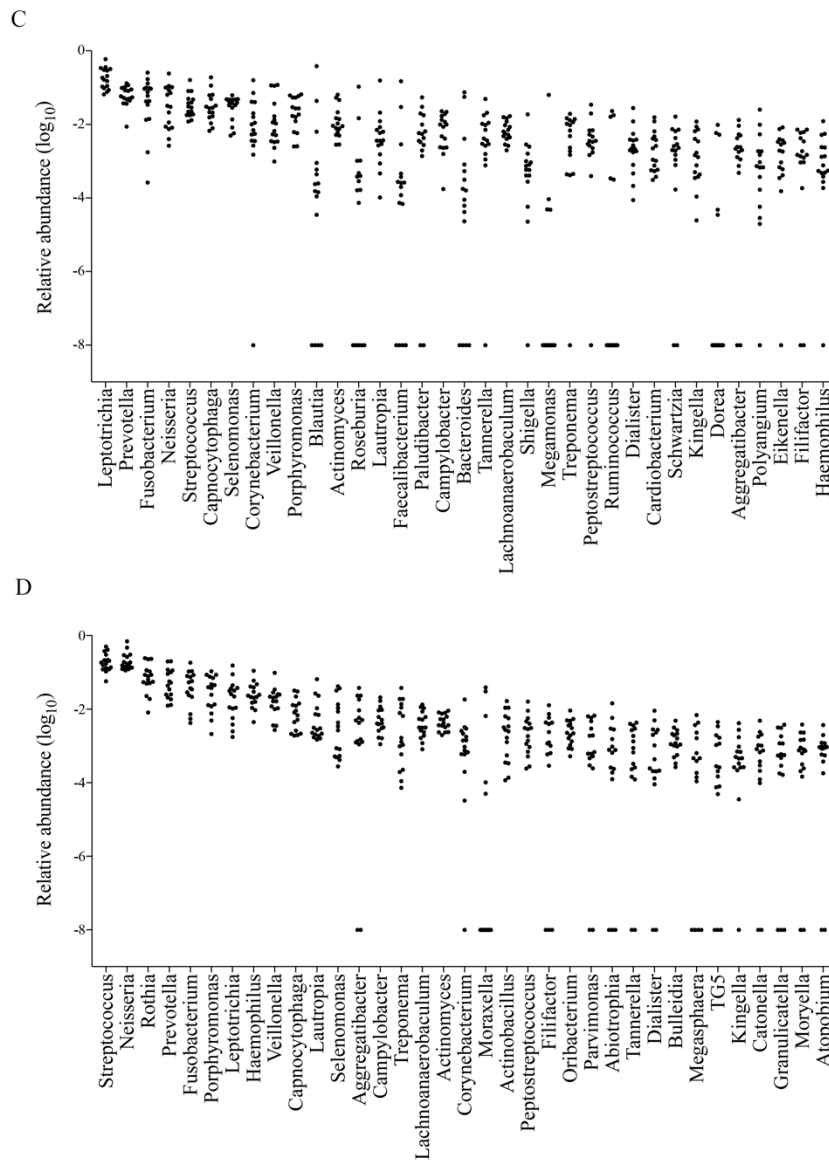

**Supplemental Figure 1** Relative abundances of the 35 most abundant genera in microbiota of mitral valves (A), gut (B), subgingival plaques (C), and saliva (D) of patients with rheumatic heart disease.

A

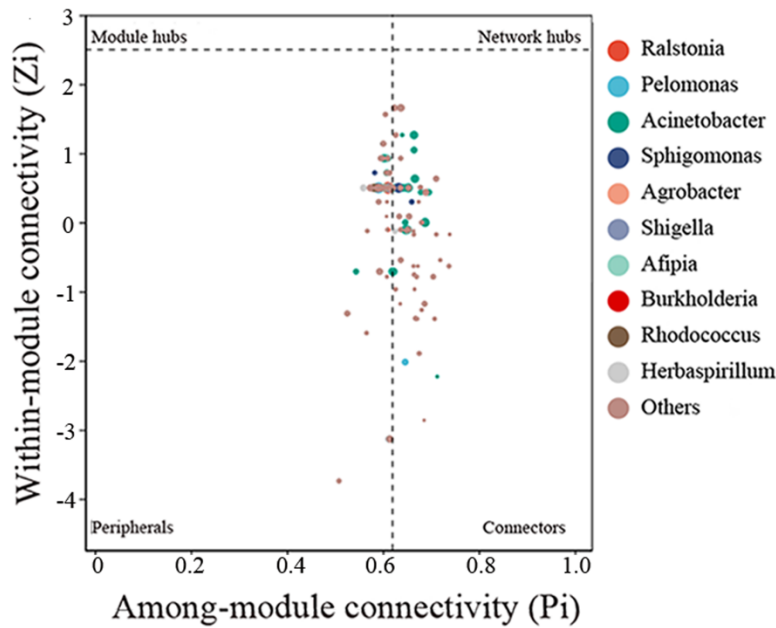

**Supplemental Figure 2** Determination of module-based topological roles (peripherals, connectors, module hubs, or network hubs) of microbiota in mitral valves of patients with rheumatic heart disease using ZP-plot at genus level. The size of dots represents abundance of each genus.

Supplemental Figure 3

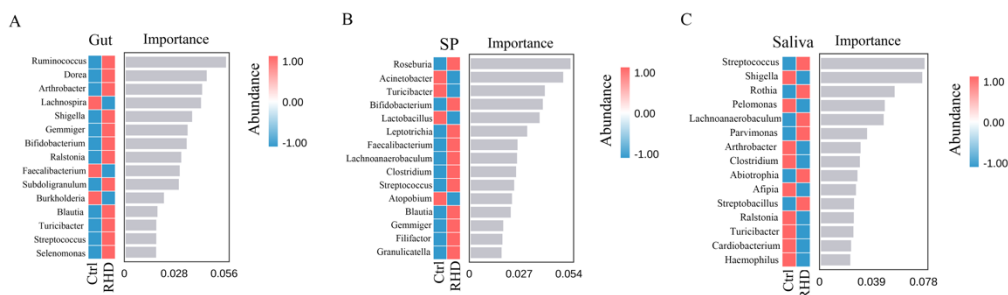

**Supplemental Figure 3** Random forest algorithm-aided identification of genus classifiers and feature importance in gut and oral microbiota of patients with rheumatic heart disease (RHD) vs control subjects (Ctrl). Relative abundance and corresponding importance of the 15 most important genus classifiers in gut microbiota

(A), subgingival plaque microbiota (B), and salivary microbiota (C) are shown. SP indicates subgingival plaque.
